# Supplementary material for: Preoperative Risk Factors of Pelvic/Para-Aortic Lymph Node Metastases in Ovarian Cancer: A Multi-Center Retrospective Study
Source: Research Square preprint supplement (doi:10.21203/rs.3.rs-1444014/v1), 2022-03-16
Supplement: Supplementary file 1 [file 7576b34b634437e1ac063a68.docx]

| Parameters | Total  (N=827) | Pelvic/para-aortic LNM（N=264） | No pelvic/para-aortic LNM  (N=563) | OR (95% CI) | *p* value |
| --- | --- | --- | --- | --- | --- |
| AFP≥2.54 ng/ml, *n (%)* | 341 (41.2) | 96 (36.4) | 245 (43.5) | 0.74 (0.55–1.01) | 0.051 |
| Eosinophil count ≥0.09*109/L,  *n (%)* | 417 (50.4) | 140 (53.0) | 277 (49.2) | 1.17 (0.87–1.56) | 0.304 |
| RBC≥4.40*1012/L, *n (%)* | 236 (28.5) | 68 (25.8) | 168 (29.8) | 0.82 (0.59–1.13) | 0.226 |
| Hb≥125.5 g/L,  *n (%)* | 269 (32.5) | 75 (28.4) | 194 (34.5) | 0.76 (0.55–1.04) | 0.083 |
| HCT≥38.25, *n (%)* | 277 (33.5) | 79 (29.9) | 198 (35.2) | 0.79 (0.57–1.08) | 0.136 |
| MCHC≥329.5 g/L, *n (%)* | 330 (39.9) | 95 (36.0) | 235 (41.7) | 0.79 (0.58–1.06) | 0.115 |
| ALT≥11.95 U/L,  *n (%)* | 477 (57.7) | 163 (61.7) | 314 (55.8) | 1.28 (0.95–1.73) | 0.105 |
| TP≥71.41 g/L,  *n (%)* | 396 (47.9) | 117 (44.3) | 279 (49.6) | 0.81 (0.60–1.09) | 0.160 |
| DBIL≥2.42 umol/L, *n (%)* | 438 (53.0) | 128 (48.5) | 310 (55.1) | 0.77 (0.57–1.03) | 0.077 |
| ALP≥84.45 U/L,  *n (%)* | 175 (21.2) | 66 (25.0) | 109 (19.4) | 1.39 (0.98–1.97) | 0.064 |
| K+≥3.935 mmol/L, *n (%)* | 543 (65.7) | 181 (68.6) | 362 (64.3) | 1.21 (0.89–1.65) | 0.229 |
| UA≥277.05 umol/L, *n (%)* | 348 (42.1) | 119 (45.1) | 229 (40.7) | 1.20 (0.89–1.61) | 0.232 |

Table S1. Factors without significant association with pelvic/para-aortic LNM in univariate analysis.

*Abbreviations:* OR odds ratios, CI confidence interval, AFP alpha fetoprotein, RBC red blood cell, Hb hemoglobin, HCT hematocrit, MCHC mean corpusular hemoglobin concerntration, ALT alanine aminotransferase, TP total protein, DBIL direct bilirubin, ALP alkaline phosphatase, UA Uric Acid, LNM lymph node metastases,
